# Supplementary material for: Dexamethasone modified by gamma-irradiation as a novel anticancer drug in human non-small cell lung cancer
Source: PubMed Central journal article supplement (PMC5884514; doi:10.1371/journal.pone.0194341), 2018-04-04
Supplement: pone.0194341.s001.pdf [file pone.0194341.s001.pdf]

## Supplementary Figures

### Dexamethasone modified by gamma-irradiation as a novel anticancer drug in human non-small cell lung cancer

Eun-Hee Lee, Chul Hong Park, Hyo Jin Choi, Remigius Ambrose Kawala, Hyoung-Woo Bai and Byung Yeoup Chung

#### **Contents:**

**S1 Fig. Inhibition of cell proliferation induced by single fraction isolated from Dex-IR**

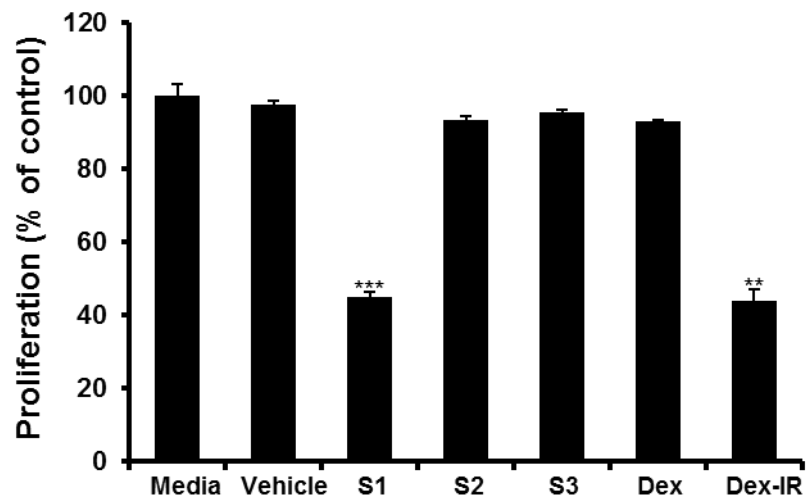

**S1 Fig. Inhibition of cell proliferation induced by single fraction isolated from Dex-IR**

H1650 cells were treated with vehicle (0.2% MeOH), S1(single fraction 1), S2(single fraction 2), S3(single fraction 3), Dex and Dex-IR at a concentration of 100 ug/ml for 24 h. The cell proliferation was assessed by MTT assay. The bar graph shows the mean  $\pm$  SEM from three independent experiments (\*\*,  $P < 0.01$ ; \*\*\*,  $P < 0.001$  vs. Media).
